# Supplementary material
Source: PubMed Central journal article supplement (PMC2877347)
Supplement: mmc1.pdf [file mmc1.pdf]

Biophysical Journal, Volume 98

**Supporting Material**

**Membrane Bending Energy and Fusion Pore Kinetics in  $\text{Ca}^{2+}$ -Triggered Exocytosis**

Zhen Zhang and Meyer B. Jackson

Supplemental data for

Membrane Bending Energy and Fusion Pore Kinetics in  $\text{Ca}^{2+}$ -Triggered Exocytosis

Zhang and Jackson

## Fig. S1

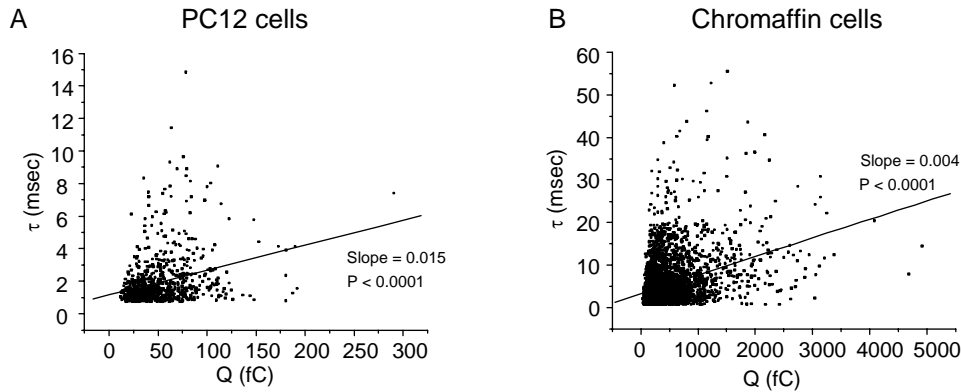

Fig. S1. Scatter plots of PSF lifetime ( $\tau$ ) versus total charge ( $Q$ ) in  $> 1000$  individual single vesicle release events from PC12 cells (A) and chromaffin cells (B). Linear regression showed highly significant correlations ( $R = 0.29$  for PC12 cells and  $0.35$  for chromaffin cells;  $P < .0001$  for the probability of no correlation for both plots). The plots were based on events  $> 20$  pA peak amplitude and prespike foot duration  $\geq 0.75$  msec. These data were binned and transformed for Fig. 1. 1163 spikes recorded from 80 PC12 cells and 3956 spikes from 107 chromaffin cells.

## Fig S2

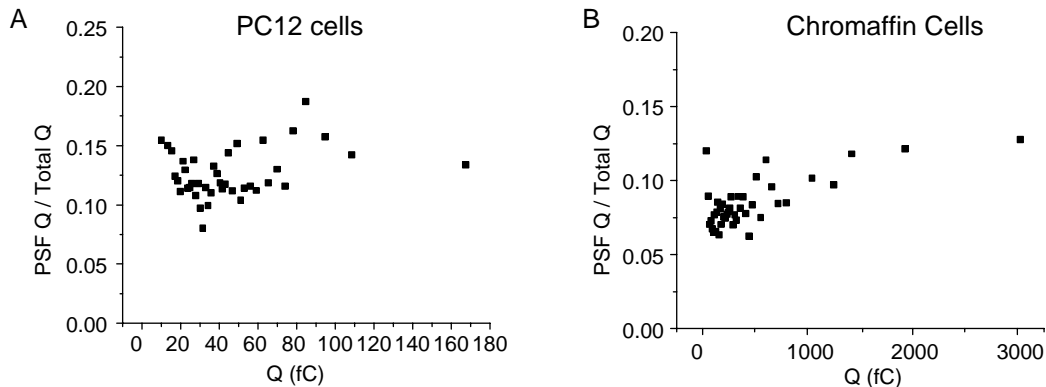

Fig. S2. Plots of fraction of total charge in a PSF ( $\text{PSF } Q / \text{Total } Q$ ) versus total charge ( $Q$ ) in a unitary event. Events were binned according to total charge and the fraction of charge in the PSF was averaged within each bin. The plots were based on events  $> 5$  pA peak amplitude and prespike foot duration  $\geq 0.75$  msec. 1487 events from 80 PC12 cells and 6257 events from 107 chromaffin cells.
